# Supplementary material
Source: Royal Society of Chemistry journal article supplement (doi:10.1039/d6mh00126b)
Supplement: d6mh00126b1.pdf [file d6mh00126b1.pdf]

# **Supplementary materials**

For

## **Tm-substituted 2:17-type Magnets: Balancing Room- Temperature Magnetic Properties and Temperature Stability**

Table 1 Magnetic performance of  $Tm_xSm_{1-x}TM_{7.6}$  magnets with different x. The  $H_k/H_{cj}$  is the squareness of demagnetization curves,  $H_{ci}$  is the coercivity field at the demagnetization curves and  $H_k$  is the magnetic field corresponding to the magnetization of 90% of remanence at the demagnetization curves.

| x   | $B_r$<br>(kGs) | $H_{cj}$<br>(kOe) | $(BH)_{max}$<br>(MGOe) | $H_k/H_{cj}$<br>(%) | $\alpha_{20-100^\circ C}$<br>(%/°C) | $\alpha_{20-150^\circ C}$<br>(%/°C) |
|-----|----------------|-------------------|------------------------|---------------------|-------------------------------------|-------------------------------------|
| 0   | 9.82           | 42.26             | 22.61                  | 90.44               | -0.0541                             | -0.061                              |
| 0.2 | 9.58           | 38.14             | 20.93                  | 95.76               | -0.0295                             | -0.0294                             |
| 0.4 | 9.45           | 33.22             | 19.70                  | 78.80               | -0.0193                             | -0.0285                             |
| 0.6 | 9.25           | 9.94              | 19.26                  | 60.30               | -0.0034                             | -0.0081                             |
| 0.8 | 8.90           | 1.26              | 5.90                   | 65.71               | -                                   | -                                   |
| 1   | 8.85           | 1.13              | 5.36                   | 66.25               | -                                   | -                                   |

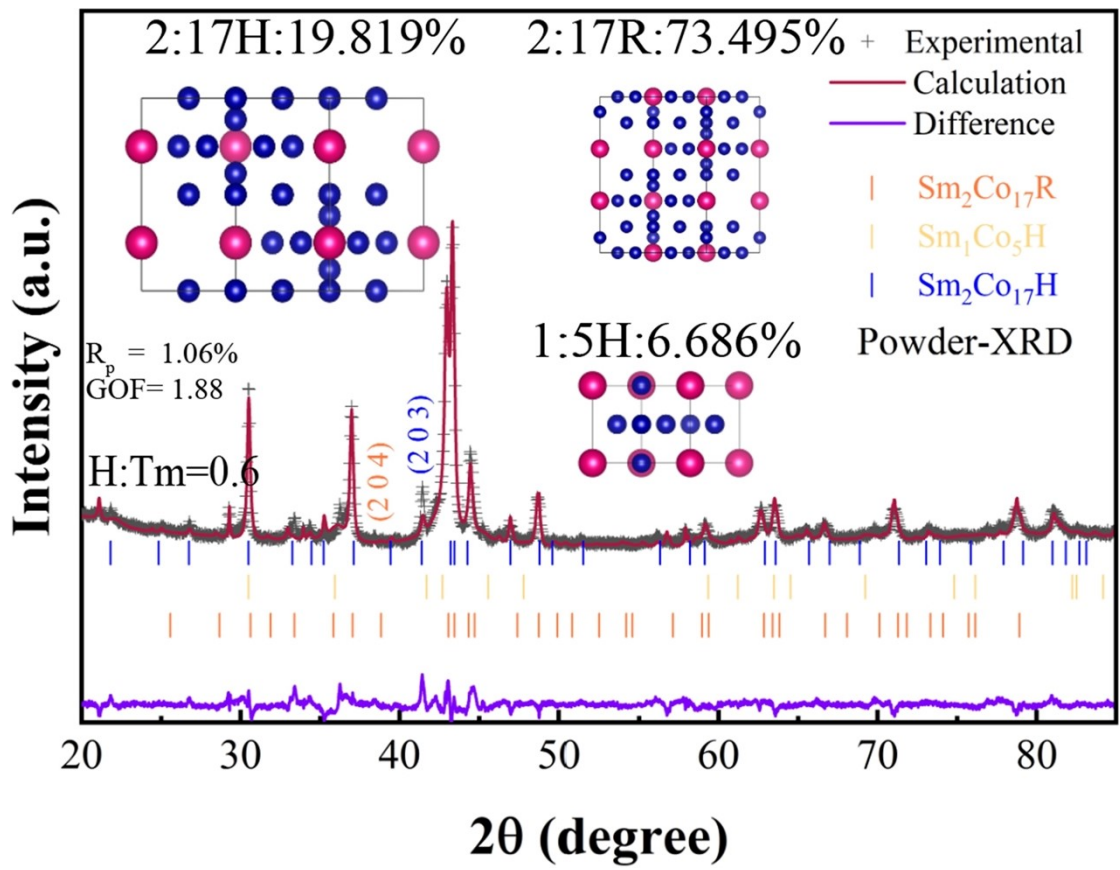

Figure S1 Rietveld refinement XRD patterns of HC- $Sm_{0.4}Tm_{0.6}TM_{7.6}$  magnets

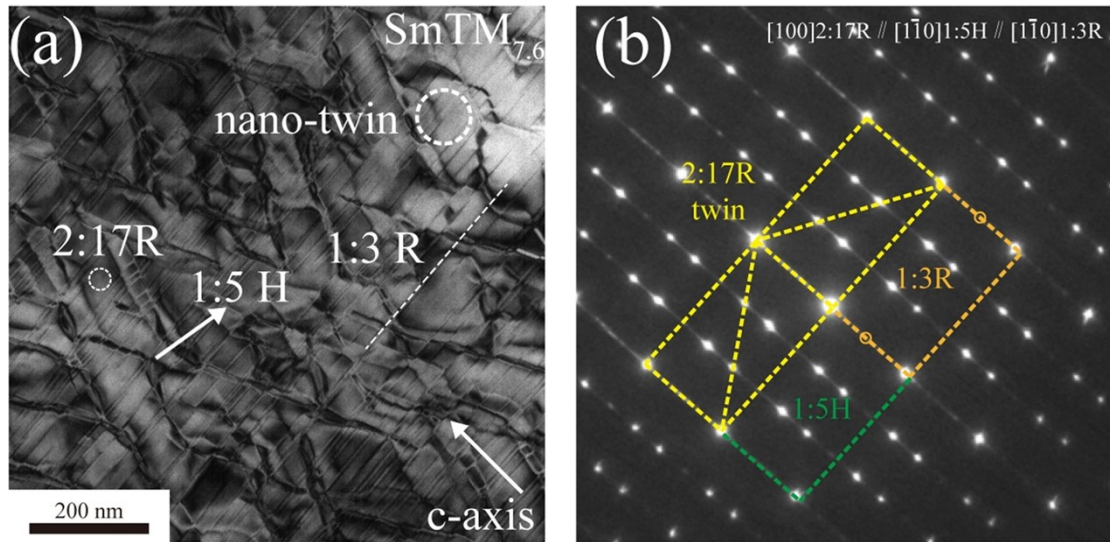

Figure S2 TEM bright-field image (a) and corresponding SAED pattern (b) of  $\text{SmTM}_{7.6}$  magnets, respectively.

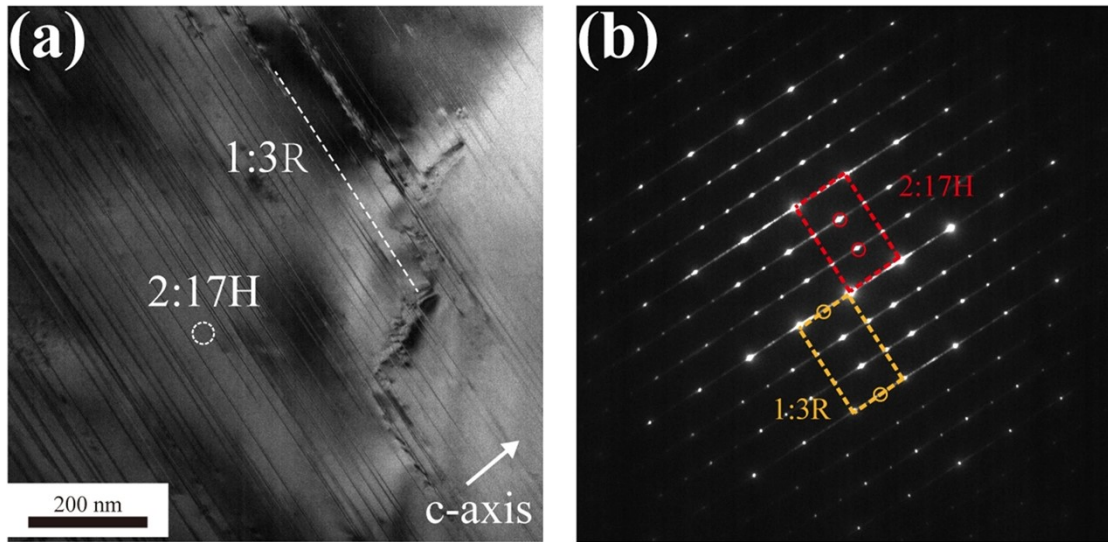

Figure S3 TEM bright-field image (a) and corresponding SAED pattern (b) of TmTM<sub>7.6</sub> magnets, respectively.

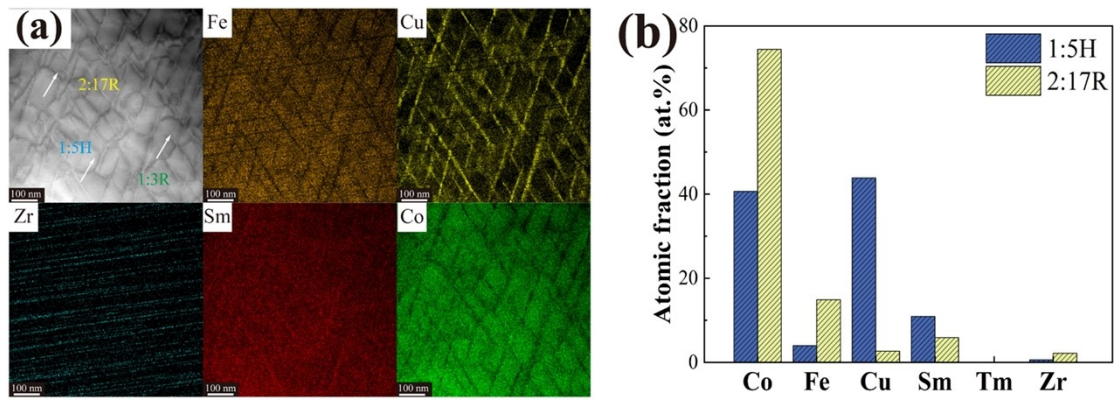

Figure S4 Elemental distribution in the cellular structures of  $\text{SmTM}_{7.6}$  magnets. (a) HDAAF image and corresponding elemental distribution maps of Co, Fe, Cu, Zr, Sm, and Tm. (b) Point-scan results of the compositions of the cellular walls and intracellular phases.

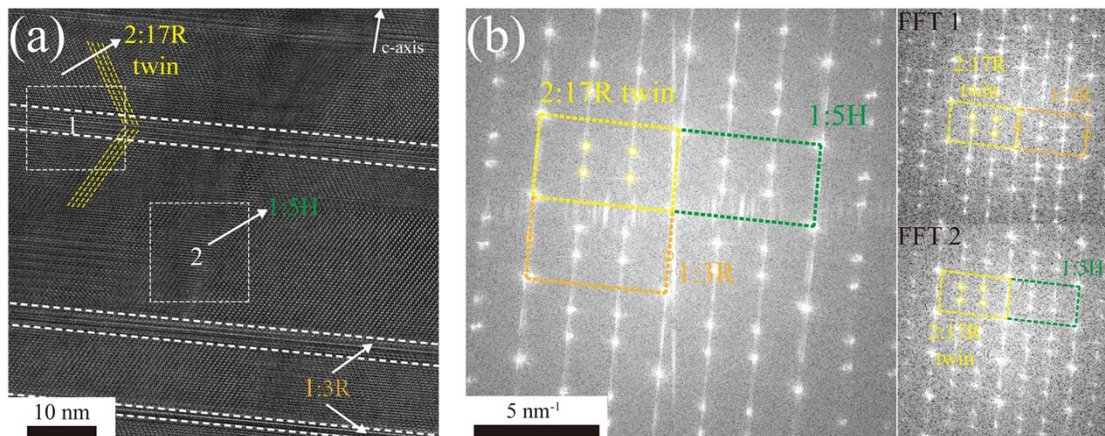

Figure S5 HRTEM image (a) and corresponding SAED patterns for  $\text{SmTM}_{7,6}$  magnets.
